# Supplementary material
Source: MDPI journal article supplement (https://www.mdpi.com/2313-0105/8/10/135)
Supplement: s1 [file s1 › batteries-1841272-supplementary.pdf]

## Development of an adequate formation protocol for a non-aqueous potassium-ion hybrid supercapacitor (KIC) through the study of the cell swelling phenomenon

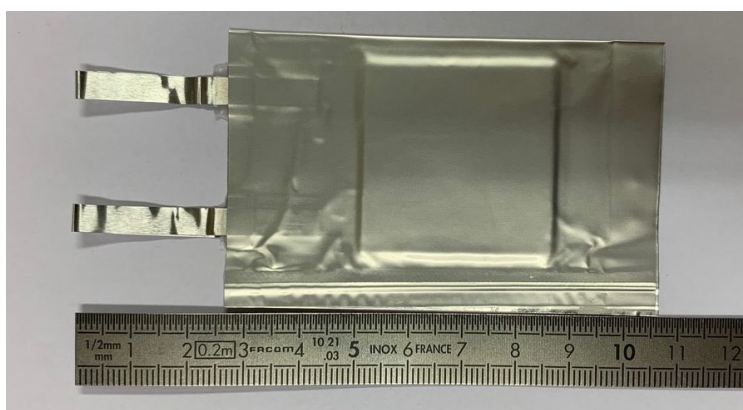

Figure S1. Pouch cell used for the tests.

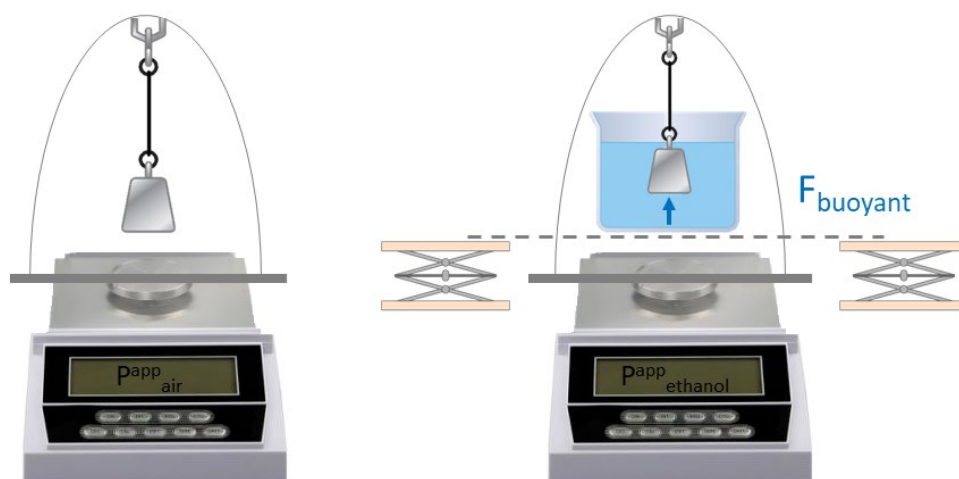

Figure S2. Experimental set-up carried out for volume measurements using Archimedes' principle

Electrochemical core definition:

For the electrochemical core, a half-current collector and the active and inactive materials on a surface of  $12.25 \text{ cm}^2$  for the two electrodes, the separator on a surface of  $12.25 \text{ cm}^2$ , and the electrolyte necessary to fill the pore volume electrodes and separator (for the parts taken into account in the calculation described above) are taken into account. A schematic representation of the electrochemical core within a sliced cell is shown below.

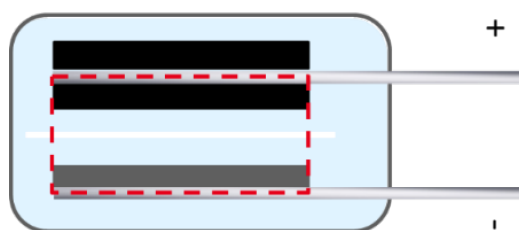

The electrochemical core considered for a hybrid KIC cell is 305.5 mg and 372.1 mg for a symmetrical EDLC cell.

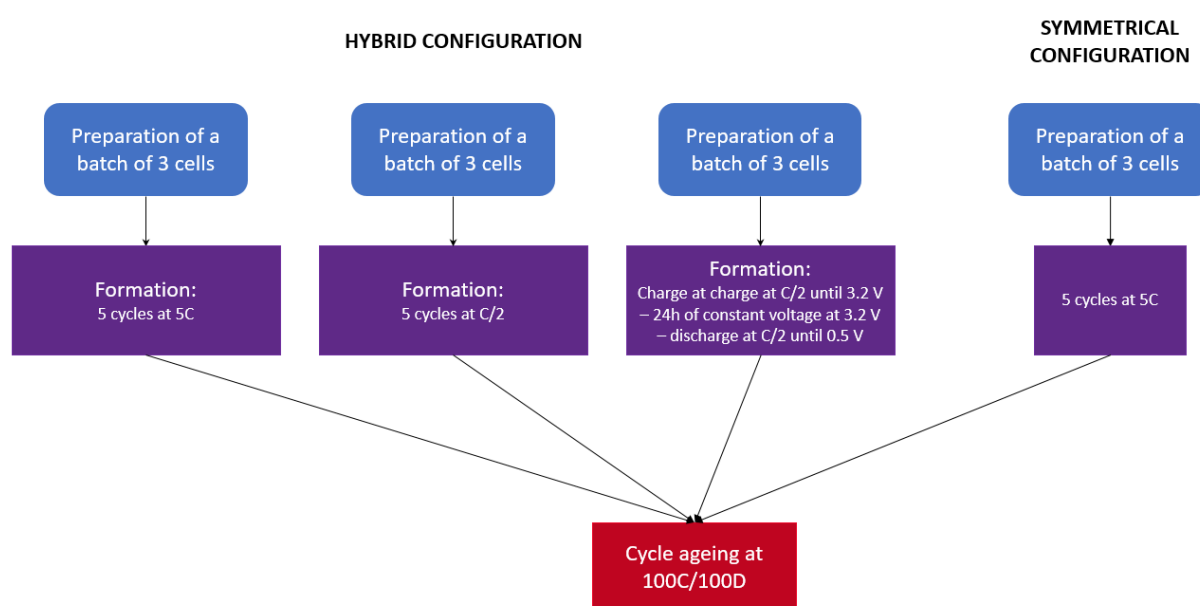

**Figure S3.** Flow chart of cycling tests conducted in this paper.

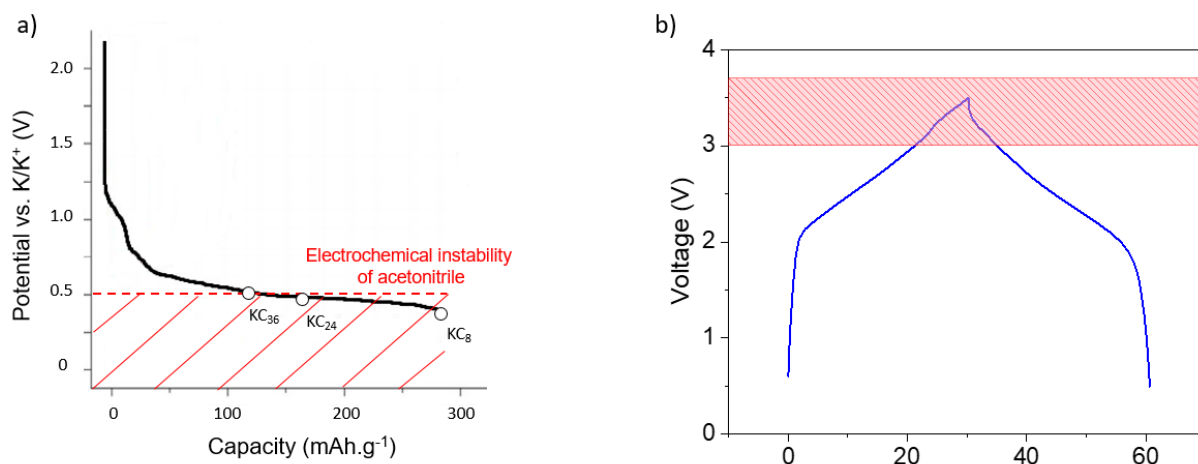

**Figure S4.** a) Schematic representation of potential profile vs. specific capacity of the negative electrode, and b) charge/discharge galvanostatic profile at 16 mA.cm<sup>-2</sup> (100C rate) of graphite/AC hybrid supercapacitor in pouch cell configuration using 0.8 mol.L<sup>-1</sup> KPF<sub>6</sub> AN at room temperature and ambient pressure

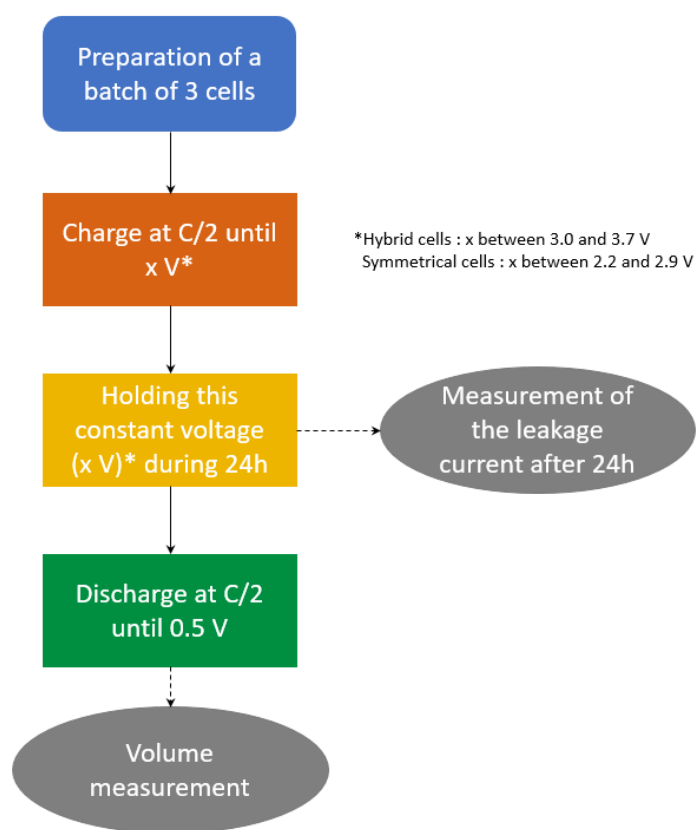

**Figure S5.** Flow chart of constant voltage tests conducted in this paper.

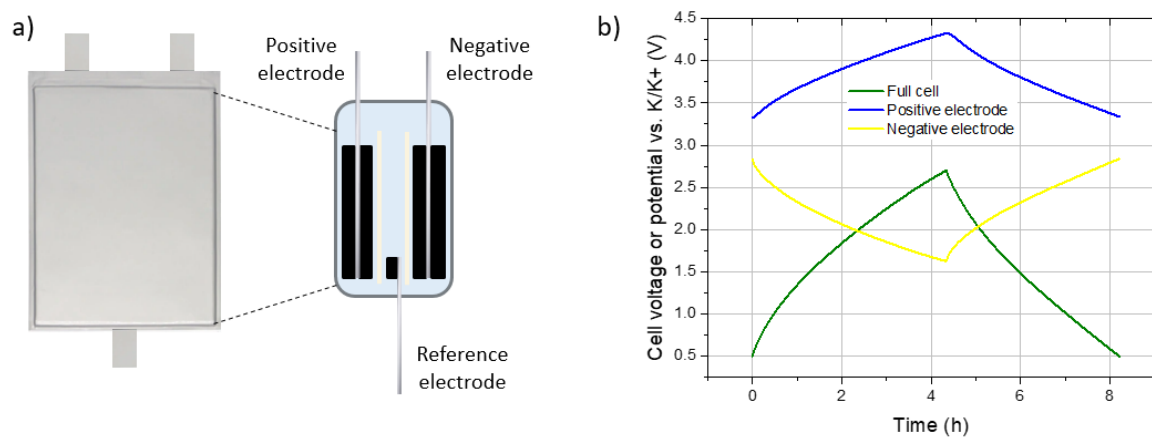

**Figure S6.** : a) Schematic representation of the three-electrode step-up, and (b) charge/discharge profiles at  $\pm 0.08$  mA.cm $^{-2}$  of an AC/AC supercapacitor in three-electrode cell configuration using 0.8 mol.L $^{-1}$  KPF $_6$  AN. The cell voltage (green) is measured while the reference electrode is used to calculate the potentials of the positive (blue) and negative (yellow) electrodes.

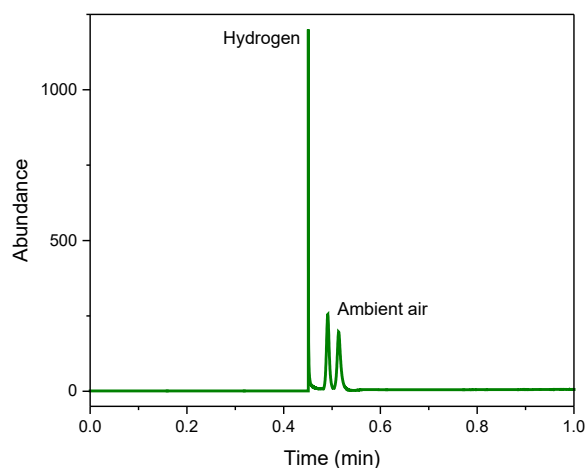

**Figure S7.** Chromatogram of gas extracted from aged graphite/AC hybrid cells using 0.8 mol.L $^{-1}$  KPF $_6$  AN.

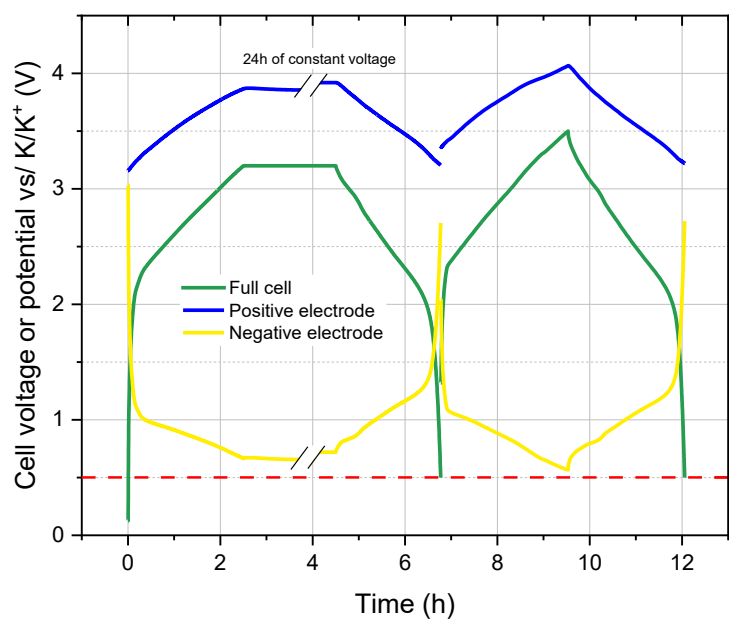

**Figure S8.** a) Cell voltage and electrode potentials profiles of graphite/AC hybrid supercapacitors in three-electrode set-up using 0.8 mol.L<sup>-1</sup> KPF<sub>6</sub> AN with a charge/discharge at  $\pm 0.08$  mA.cm<sup>-2</sup> and a 24-hour constant voltage step at 3.2 V, followed by a galvanostatic charge/discharge cycle at  $\pm 0.08$  mA.cm<sup>-2</sup>.
